# Supplementary material for: A Simple Procedure to Assess Limit of Detection for Multisensor Systems
Source: MDPI journal article supplement (doi:10.3390/s19061359), 2019-03-18
Supplement: s1 [file s1]

## Supplementary material 1. MATLAB script for LOD estimation algorithm

```
function [lod_value] = lodestimation(data,k)

%This function allows to estimate a limit of detection value
%for a given regression model.
%
%Input arguments
%
%data - a matrix Nx2, where N is a number of samples, the first column
%contains measured concentration values (obtained by a reference method),
%the second one - concentrations, predicted by a regression model.
%NB!
%Verify if the both columns have the same length, the concentration
%values are in the same molar units (e.g., mol/l, cmol/l) and are sorted
%in ascending order!
%
%k - the accuracy criterion (defines the acceptable magnitude of
%mean relative error increment fluctuations around zero in %).
%Choose 1 for realistic LOD estimation, the higher is k, the more
%optimistic are the results.
%
%Output values
%
%lod_value - an estimated LOD value. Round to nearest integer is
%recommended.
%
%figure "System Functioning" is a visualisation of the system performance
%on different concentration ranges.
%
%figure "LOD estimation" is a graphical representation of LOD estimation.
%The horizontal line corresponds to the chosen k value, the vertical line
%corresponds to the LOD value.

ymear = data(:,1);
ypred = data(:,2);
ymear_1 = length (ymear);
mre = zeros(ymear_1,1);

    for i = 1:ymear_1
        mre(i,1) = abs((ymear(i,1) - ypred(i,1))/ymear(i,1));
    end

    averaged_mre = zeros(ymear_1-1,1);
    averaged_conc = zeros(ymear_1-1,1);

    for i = 1:ymear_1-1

        averaged_mre (i,1) = abs(mean(mre(1:i+1,1)));
        averaged_conc (i,1) = abs(mean(ymear(1:i+1,1)));

    end

    incr_mre = zeros(ymear_1-2,1);

    for i = 1:ymear_1-2
```

```

        incr_mre (i,1) = abs(averaged_mre(i+1,1) - averaged_mre(i,1))*100;
    end

    lod_crit = ones(y meas_1-2,1)*k;

    lod_incr = find(round(incr_mre)>k, 1, 'last' );
    if isempty(lod_incr)

        error('LOD value is out of the given concentration range');

    else

        lod_value = averaged_conc(lod_incr+1,1);
        lod_line = ones(y meas_1-2,1)*lod_value;

    end

    figure('Name','System Functioning');

    plot(averaged_conc,averaged_mre,'LineStyle','none','Marker','o','MarkerEdgeColor',
    'black','MarkerFaceColor','r')
    title('System Functioning')
    xlabel('Averaged concentration, M')
    ylabel('Averaged MRE');
    figure('Name','LOD estimation');
    plot(averaged_conc(1:y meas_1-
    2,1),incr_mre,'LineStyle','none','Marker','o','MarkerEdgeColor','black','MarkerF
    aceColor','r')
    title('LOD estimation')
    xlabel('Averaged concentration, M')
    ylabel('Averaged MRE increment,%')
    hold on
    plot(averaged_conc(1:y meas_1-2,1),lod_crit,'-g')
    hold on
    plot(lod_line,incr_mre,'-g');

```
